# Supplementary material
Source: HighWire-hosted journal article supplement (http://www.jrheum.org/highwire/filestream/34796/field_highwire_adjunct_files/0/181062DataSuppl.pdf)
Supplement: 181062DataSuppl.pdf [file 181062DataSuppl.pdf]

## ONLINE SUPPLEMENTARY DATA

### *Supplementary Table 1. The Delphi Questionnaire: “Part 1 - Clinical Practice”.*

|                                                                                                                                                                     | SCORE (1-5) | Comments |
|---------------------------------------------------------------------------------------------------------------------------------------------------------------------|-------------|----------|
| <b>1. In clinical practice</b>                                                                                                                                      |             |          |
| <b>Biopsy sampling:</b>                                                                                                                                             |             |          |
| -A minimum of 3 synovial biopsies needs to be retrieved in large joints.                                                                                            |             |          |
| -A minimum of 2 biopsies should be retrieved in small joints.                                                                                                       |             |          |
| -Biopsies should be performed in at least 2 different areas of the joint if large.                                                                                  |             |          |
| -Biopsies should be performed in at least 3 different areas of the joint if large.                                                                                  |             |          |
| -Biopsies should be performed in at least 2 different areas of the joint if small.                                                                                  |             |          |
| -Bacteriological, fungal and mycobacteriological assessment should occur in each patient.                                                                           |             |          |
| -Polymerase chain reaction analysis for RNA 16S should be performed for each patient.                                                                               |             |          |
| -Polymerase chain reaction analysis for Lyme and Whipple diseases should be performed for each patient.                                                             |             |          |
|                                                                                                                                                                     |             |          |
| <b>Biopsy processing:</b>                                                                                                                                           |             |          |
| -At least 2 biopsies should be formalin-fixed and paraffin-embedded.                                                                                                |             |          |
| -The biopsies should spend 48 hours in formalin.                                                                                                                    |             |          |
| -The biopsies should spend 24 hours in formalin.                                                                                                                    |             |          |
| -1 biopsy should be snap frozen.                                                                                                                                    |             |          |
| -More than one biopsy should be snap frozen.                                                                                                                        |             |          |
| -Sections should be 3 micrometers thick minimum.                                                                                                                    |             |          |
|                                                                                                                                                                     |             |          |
| <b>Histological criteria:</b>                                                                                                                                       |             |          |
| -Synovial biopsy surface should be more than 2.5mm <sup>2</sup> .                                                                                                   |             |          |
| -A synovial lining layer should be seen.                                                                                                                            |             |          |
| -Morphology of the synovial tissue should be 100% preserved.                                                                                                        |             |          |
| -Synovial biopsy should include a minimum of 5 vessels.                                                                                                             |             |          |
| -Synovial biopsy should include a minimum of 10 vessels.                                                                                                            |             |          |
| -Stroma should represent up to 30% of the biopsy area.                                                                                                              |             |          |
| -Stroma should represent up to 50% of the biopsy area.                                                                                                              |             |          |
| -Stroma should represent up to 60% of the biopsy area.                                                                                                              |             |          |
|                                                                                                                                                                     |             |          |
| <b>Staining and IHC:</b>                                                                                                                                            |             |          |
| -An H&E staining should always be performed.                                                                                                                        |             |          |
| -CD3 staining should always be performed.                                                                                                                           |             |          |
| -CD19 or CD20 staining should always be performed.                                                                                                                  |             |          |
| -CD68 staining should always be performed.                                                                                                                          |             |          |
| - Additional CD4 staining should always be performed.                                                                                                               |             |          |
| -Additional CD4 and CD8 staining should always be performed.                                                                                                        |             |          |
| -FVIII or CD31 staining should always be performed.                                                                                                                 |             |          |
| -Other staining should always be performed.                                                                                                                         |             |          |
| - IHC results should be given using a semi-quantitative score (0-3)                                                                                                 |             |          |
| - IHC staining should be assessed using digital analysis software                                                                                                   |             |          |
|                                                                                                                                                                     |             |          |
| <b>Biopsies interpretation and Pathologist's report.</b>                                                                                                            |             |          |
| -A Krenn score should always be performed to assess inflammation.                                                                                                   |             |          |
| -Other scores for intensity of inflammation should be performed.                                                                                                    |             |          |
| -Lining layer hyperplasia should be scored.                                                                                                                         |             |          |
| -Absolute number of vessels should be assessed.                                                                                                                     |             |          |
| -Synovial pathotype should be described.                                                                                                                            |             |          |
| -Presence or absence of lymphoid follicles within the membrane should be described.                                                                                 |             |          |
| -A quantitative cell count using a digital analysis should be performed because it is more accurate.                                                                |             |          |
| -A semi quantitative evaluation of the number of cells is accurate enough.                                                                                          |             |          |
| -If a semi-quantitative or quantitative analysis is performed for a single biopsy, the assessment of a single area is sufficient.                                   |             |          |
| - If a semi-quantitative or quantitative analysis is performed for a single biopsy, at least 3 area of the biopsy should be assessed.                               |             |          |
| - If a semi-quantitative or quantitative analysis is performed for multiple biopsies, average score should be calculated and given for the analysis of inflammation |             |          |
| -Conclusion of the pathologist should always mention the likeliest diagnosis.                                                                                       |             |          |

*Supplementary Table 2. The Delphi Questionnaire: “Part 2 - Translational Research”.*

|                                                                                                                                       | SCORE (1-5) | Comments |  |
|---------------------------------------------------------------------------------------------------------------------------------------|-------------|----------|--|
| <b>2. In clinical research</b>                                                                                                        |             |          |  |
| <b>Biopsy sampling:</b>                                                                                                               |             |          |  |
| -A minimum of 3 synovial biopsies needs to be retrieved in large joints.                                                              |             |          |  |
| -A minimum of 2 biopsies should be retrieved in small joints.                                                                         |             |          |  |
| -Biopsies should be performed in at least 2 different areas of the joint if large.                                                    |             |          |  |
| -Biopsies should be performed in at least 3 different areas of the joint if large.                                                    |             |          |  |
| -Biopsies should be performed in at least 2 different areas of the joint if small.                                                    |             |          |  |
|                                                                                                                                       |             |          |  |
| <b>Biopsy processing:</b>                                                                                                             |             |          |  |
| -At least 2 biopsies should be formalin-fixed and paraffin-embedded.                                                                  |             |          |  |
| -The biopsies should spend 48 hours in formalin.                                                                                      |             |          |  |
| -The biopsies should spend 24 hours in formalin.                                                                                      |             |          |  |
| -1 biopsy should be snap frozen.                                                                                                      |             |          |  |
| -More than one biopsy should be snap frozen.                                                                                          |             |          |  |
| -5 biopsies should be snap frozen to perform RNA extraction.                                                                          |             |          |  |
| -Sections should be 3 micrometers thick minimum.                                                                                      |             |          |  |
|                                                                                                                                       |             |          |  |
| <b>Histological criteria:</b>                                                                                                         |             |          |  |
| -Synovial biopsy surface should be more than 2.5mm <sup>2</sup> .                                                                     |             |          |  |
| -A synovial lining layer should be seen.                                                                                              |             |          |  |
| -Morphology of the tissue should be preserved.                                                                                        |             |          |  |
| -Synovial biopsy should include a minimum of 5 vessels.                                                                               |             |          |  |
| -Synovial biopsy should include a minimum of 10 vessels.                                                                              |             |          |  |
| -Stroma should represent up to 30% of the biopsy area.                                                                                |             |          |  |
| -Stroma should represent up to 50% of the biopsy area.                                                                                |             |          |  |
| -Stroma should represent up to 60% of the biopsy area.                                                                                |             |          |  |
|                                                                                                                                       |             |          |  |
| <b>Staining and IHC :</b>                                                                                                             |             |          |  |
| -An H&E staining should always be performed.                                                                                          |             |          |  |
| -CD3 staining should always be performed.                                                                                             |             |          |  |
| -CD19 or CD20 staining should always be performed.                                                                                    |             |          |  |
| -CD68 staining should always be performed.                                                                                            |             |          |  |
| -CD 131 staining should always be performed.                                                                                          |             |          |  |
| - Additional CD4 staining should always be performed.                                                                                 |             |          |  |
| -Additional CD4 and CD8 staining should always be performed.                                                                          |             |          |  |
| -FVIII or CD31 staining should always be performed.                                                                                   |             |          |  |
| -Other staining should always be performed.                                                                                           |             |          |  |
|                                                                                                                                       |             |          |  |
| <b>Biopsies interpretation and Pathologist's report.</b>                                                                              |             |          |  |
| -A Krenn score should always be performed to assess inflammation.                                                                     |             |          |  |
| -Other scores for intensity of inflammation should be performed.                                                                      |             |          |  |
| -Lining layer hyperplasia should be scored.                                                                                           |             |          |  |
| -Absolute number of vessels should be assessed.                                                                                       |             |          |  |
| -A quantitative cell count using a digital analysis should be performed because it is more accurate.                                  |             |          |  |
| -A semi quantitative evaluation of the number of cells is accurate enough.                                                            |             |          |  |
| -If a semi-quantitative or quantitative analysis is performed for a single biopsy: the assessment of a single area is sufficient.     |             |          |  |
| - If a semi-quantitative or quantitative analysis is performed for a single biopsy: at least 3 area of the biopsy should be assessed. |             |          |  |
| -Average score should be calculated and given for the analysis of inflammation and vascularization                                    |             |          |  |
| -Presence or absence of lymphoid follicles within the membrane should be described.                                                   |             |          |  |
| -Synovial pathotype should be described                                                                                               |             |          |  |
|                                                                                                                                       |             |          |  |
| <b>RNA analysis</b>                                                                                                                   |             |          |  |
| -RNA extraction should be performed in each biopsy.                                                                                   |             |          |  |
| -Biopsies of one patient should be pooled for RNA extraction.                                                                         |             |          |  |
| -A minimum of 10mg of synovial tissue should be used for RNA extraction.                                                              |             |          |  |
